# Supplementary material for: Cognitive Performance and Health-Related Quality of Life in Patients with Neuromyelitis Optica Spectrum Disorder
Source: MDPI journal article supplement (doi:10.3390/jpm12050743), 2022-05-02
Supplement: s1 [file s1]

## Supplementary material

**Table S1.** Demographic, clinical and patient-centred measures differences between AQP4-IgG-positive and -negative patients.

|                                                | AQP4-IgG positive<br>( <i>n</i> = 27) | AQP4-IgG negative<br>( <i>n</i> = 13) | Corrected<br><i>p</i> -value |
|------------------------------------------------|---------------------------------------|---------------------------------------|------------------------------|
| <b>Demographic and clinical data</b>           |                                       |                                       |                              |
| Age (years)                                    | 46 (39.5 – 49)                        | 42 (28 – 47)                          | 0.464 <sup>b</sup>           |
| Female, <i>n</i> (%)                           | 25 (93)                               | 9 (69)                                | 0.428 <sup>a</sup>           |
| Disease duration (years)                       | 8.3 (6.3 – 17.6)                      | 4.8 (1.6 – 10.1)                      | 0.204 <sup>b</sup>           |
| EDSS score (range)                             | 2.0 (1.0 – 7.5)                       | 2.0 (0 – 6.0)                         | 0.942 <sup>b</sup>           |
| Number of relapses                             | 2.5 (1 – 4)                           | 3 (2 – 3.5)                           | 0.598 <sup>b</sup>           |
| Current treatment, <i>n</i> (%)                | 27 (100)                              | 9 (69)                                | 0.120 <sup>a</sup>           |
| Beck Depression Inventory-Fast Screen (BDI-FS) | 3 (0 – 7.5)                           | 3 (2 – 5)                             | 0.570 <sup>b</sup>           |
| Fatigue Impact Scale for Daily Use (D-FIS)     | 6 (2 – 18.5)                          | 12 (3 – 17)                           | 0.598 <sup>b</sup>           |
| <b>Patient-centred measures</b>                |                                       |                                       |                              |
| Physical MSIS-29v2                             | 33 (23 – 48.5)                        | 40 (28 – 59)                          | 0.915 <sup>c</sup>           |
| Psychological MSIS-29v2                        | 18 (12.5 – 26)                        | 25 (17 – 33)                          | 0.620 <sup>c</sup>           |
| Satisfaction with Life Scale (SWLS)            | 21 (18 – 28)                          | 21 (18 – 24)                          | 0.915 <sup>c</sup>           |
| SymptoMScreen questionnaire (SyMS)             | 19 (7 – 29.5)                         | 16 (10 – 32)                          | 0.915 <sup>c</sup>           |
| Stigma Scale for Chronic Illness (SSCI-8)      | 9 (8 – 13)                            | 12 (9 – 15)                           | 0.620 <sup>c</sup>           |
| MOS Pain Effects Scale (PES)                   | 14 (9 – 19.5)                         | 17 (9 – 20)                           | 0.914 <sup>c</sup>           |

The data represent the absolute numbers and proportions of qualitative data and the median and IQR for quantitative data, unless otherwise specified. AQP4-IgG: aquaporin-4 immunoglobulin G; EDSS: Expanded Disability Status Scale; MSIS-29v2: Multiple Sclerosis Impact Scale. One patient was excluded due to unknown serostatus.

<sup>a</sup>Chi-squared test; <sup>b</sup>Kruskal–Wallis test; <sup>c</sup>Age and sex-adjusted ANOVA and corrected by FDR adjustment.

**Table S2.** Demographic, clinical and patient-centred measures differences between CI and CP patients.

|                                                | CI patients<br>( <i>n</i> = 14) | CP patients<br>( <i>n</i> = 27) | Corrected<br><i>p</i> -value |
|------------------------------------------------|---------------------------------|---------------------------------|------------------------------|
| <b>Demographic and clinical data</b>           |                                 |                                 |                              |
| Age (years)                                    | 45 (41.5 - 52.8)                | 44 (28.5 - 45)                  | 0.098 <sup>c</sup>           |
| Female, women, <i>n</i> (%)                    | 13 (93)                         | 22 (81)                         | 0.097 <sup>a</sup>           |
| Disease duration                               | 7.94 (2.38 - 11.9)              | 8.64 (5.03 - 15.6)              | 0.523 <sup>b</sup>           |
| AQP4-IgG positive, <i>n</i> (%)                | 11 (79)                         | 16 (59)                         | 0.457 <sup>a</sup>           |
| EDSS score (range)                             | 3.0 (1.0 - 6.0)                 | 2.0 (0 - 7.5)                   | 0.267 <sup>b</sup>           |
| Number of relapses                             | 3 (3 - 4)                       | 2 (1 - 3.75)                    | 0.093 <sup>b</sup>           |
| Current treatment, <i>n</i> (%)                | 13 (93)                         | 24 (89)                         | 0.999 <sup>a</sup>           |
| Beck Depression Inventory-Fast Screen (BDI-FS) | 4.5 (0.7 - 8)                   | 2 (0.5 - 5)                     | 0.248 <sup>b</sup>           |
| Fatigue Impact Scale for Daily Use (D-FIS)     | 15.5 (5 - 19.8)                 | 5 (2 -13)                       | 0.109 <sup>b</sup>           |
| <b>Patient-centred measures</b>                |                                 |                                 |                              |
| Physical MSIS-29v2                             | 46.5 (31.8 - 58.8)              | 32 (23 - 43.5)                  | 0.055 <sup>d</sup>           |
| Psychological MSIS-29v2                        | 24.5 (17 - 32)                  | 18 (11 - 26)                    | 0.096 <sup>d</sup>           |
| Satisfaction with Life Scale (SWLS)            | 18 (15 - 21)                    | 22 (20 - 27.5)                  | 0.043 <sup>d</sup>           |
| SymptoMScreen questionnaire (SyMS)             | 26.5 (18.2 - 43.8)              | 11 (6 - 25.5)                   | 0.043 <sup>d</sup>           |
| Stigma Scale for Chronic Illness (SSCI-8)      | 13.5 (10 - 16)                  | 9 (8 - 11)                      | 0.043 <sup>d</sup>           |
| MOS Pain Effects Scale (PES)                   | 19 (12.5 - 21.8)                | 11 (8.5 - 19)                   | 0.043 <sup>d</sup>           |

The data represent the absolute numbers and proportions of qualitative data and the median and IQR for quantitative data, unless otherwise specified. CP: cognitively preserved; CI: cognitive impairment; AQP4-IgG: aquaporin-4 immunoglobulin G; EDSS: Expanded Disability Status Scale; MSIS-29v2: MultipleSclerosis Impact Scale.

<sup>a</sup>Chi-squared test; <sup>b</sup>Kruskal-Wallis test; <sup>c</sup>Student's *t*-test; <sup>d</sup>Age and sex-adjusted ANOVA and corrected by FDR adjustment.
